# Supplementary material for: Recent and Ongoing Horizontal Transfer of Mitochondrial Introns Between Two Fungal Tree Pathogens
Source: Front Microbiol. 2021 Jun 2;12:656609. doi: 10.3389/fmicb.2021.656609 (PMC8208691; doi:10.3389/fmicb.2021.656609)
Supplement: Supplementary file 3 [file Table_1.xlsx]

## Sheet: Sheet1
Supplemental Table 1. Presence and location of mitochondrial introns typical of Asian (pink in AAC genomes, red in LAC genomes), Latin American (blue) or both (green) isolates of Ceratocystis and percent homology to the reference intron in Ceratocystis huliohia. A minus (-) indicates than an intron is absent in that genome. Introns that were not found in C. huliohia are only marked as present (+)…
	rnl												nad2					nad3	atp9	cox2												nad4L	nad5													cob
	int1	int2	int3	int4	int5	int6	int7	int8	int9	int10	int11	int12	int 1	int 2	int 3	int 4	int 5	int 1	N/A	int 1	int 2	int 3	int 4	int 5	int 6	int 7	int 8	N/A	int9	int10	int11	int 1	int 1	int 2	int 3	int 4	int 5	int 6	int 7	int 8	int 9	int 10	int 11	int 12	int 13	int 1	int 2	int 3	int 4
	Group II	Group II	Group IA3	Group I (A-derived)	Group I (A-derived)	Group IC2	Group IC2	Group ID	Group II	Group IA	Group IB	Group IA	Group II	Group II	Group IC2	Group IC2	Group II	Group IC2	N/A	Group IC2	Group IC2	Group IC2	Group I (B2 derived)	Group IC2	Group II	Group IA	Group ID	HEG; part of int 8	Group IC2	Group IC1	Group IC2	Group IC1	Group ID	Group ID	Group IC2	Group ID	Group IB	Group ID	Group IB	Group IC2	Group IB	Group IB	Group IB	Group I (A-derived)	Group IC2	Group II	Group IB	Group I (B1-derived)	Group ID
	SPAM3	SPAM7											SPAM1	SPAM6											SPAM11			SPAM8																		SPAM5
C. polychroma (Indonesia) C2240	100	–	–	+	–	98.3	–	+	+	97.6	99.9	–	99.4	99.1	–	99	+	96.1	N/A	98.2	–	+	+	+	–	+	90.4	–	96.8	+	–	99.9	88.3	+	99.8	–	99.6	+	+	+	+	+	–	+	+	79.3	95.3	+	99.6
C. changhui (China) C3371	–	99.5	+	+	97.4	97.4	–	–	–	100	100	+	98.8	98.9	–	97.7	–	99.3	N/A	100	99.5	–	–	–	100	+	99.1	98.6	100	–	–	100	100	–	100	61.5	100	–	–	–	–	–	+	–	–	100	95.3	+	100
C. uchidae (Hawaii) C1714	–	99.5	–	+	98.5	98.1	–	–	–	99.9	100	+	99.2	–	–	99.1	–	100	N/A	100	99.2	–	–	–	100	–	100	100	100	–	–	100	100	–	100	99.5	99.9	–	–	–	–	–	+	–	–	100	100	+	99.9
C. huliohia (Hawaii) C4381	100	100	–	–	100	100	–	–	–	100	100	–	100	100	–	100	–	100	N/A	100	100	–	–	–	100	–	100	100	100	–	–	100	100	–	100	100	100	–	–	–	–	–	–	–	–	100	100	–	100
C. huliohia (Hawaii) C4189	100	100	–	–	100	100	–	–	–	100	100	–	100	100	–	100	–	100	N/A	100	100	–	–	–	100	–	100	100	100	–	–	100	100	–	100	100	100	–	–	–	–	–	–	–	–	100	100	–	100
C. huliohia (Hawaii) C4194	Reference	Reference	–	–	Reference	Reference	–	–	–	Reference	Reference	–	Reference	Reference	–	Reference	–	Reference	N/A	Reference	Reference	–	–	–	Reference	–	Reference	Reference	Reference	–	–	Reference	Reference	–	Reference	Reference	Reference	–	–	–	–	–	–	–	–	Reference	Reference	–	Reference
C. lukuohia (Hawaii) C4124	100	100	–	–	96.5	94.2	–	+	–	97.8	97.2	–	100	100	+	88	–	82.8	N/A	–	–	+	+	–	–	+	99.7	100	–	+	+	99.9	89.4	–	99.8	–	–	–	–	+	+	+	+	+	+	–	99.9	+	98.9
C. lukuohia (Hawaii) C4321	100	100	–	–	96.5	94.2	–	+	–	97.8	97.2	–	100	100	+	88	–	82.8	N/A	–	–	+	+	–	–	+	90.4	–	–	+	+	99.9	89.4	–	99.8	–	–	–	–	+	+	+	+	+	+	–	99.9	+	98.9
C. lukuohia (Hawaii) C4342	100	100	–	–	96.5	94.2	–	+	–	97.8	97.2	–	100	100	+	88	–	82.8	N/A	–	–	+	+	–	–	+	99.7	100	–	+	+	99.9	89.4	–	99.8	–	–	–	–	+	+	+	+	+	+	–	99.9	+	98.9
C. lukuohia (Hawaii) C4185	100	100	–	–	96.5	94.2	–	+	–	97.8	97.2	–	100	–	+	88	–	82.8	N/A	–	–	+	+	–	–	+	90.4	–	–	+	+	99.9	89.4	–	99.8	–	–	–	–	+	+	+	+	+	+	–	99.9	+	98.9
C. lukuohia (Hawaii) C4364	100	100	–	–	96.5	94.2	–	+	–	97.8	97.2	–	–	–	+	88	–	82.8	N/A	–	–	+	+	–	–	+	90.4	–	–	+	+	99.9	89.4	–	99.8	–	–	–	–	+	+	+	+	+	+	–	99.9	+	98.9
C. lukuohia (Hawaii) C4128	–	100	–	–	96.5	94.2	–	+	–	97.8	97.2	–	–	–	+	88	–	82.8	N/A	–	–	+	+	–	–	+	90.4	–	–	+	+	99.9	89.4	–	99.8	–	–	–	–	+	+	+	+	+	+	–	99.9	+	98.9
C. lukuohia (Hawaii) C4183	–	100	–	–	96.5	94.2	–	+	–	97.8	97.2	–	–	–	+	88	–	82.8	N/A	–	–	+	+	–	–	+	90.4	–	–	+	+	99.9	89.4	–	99.8	–	–	–	–	+	+	+	+	+	+	–	99.9	+	98.9
C. lukuohia (Hawaii) C4341	100	100	–	–	96.5	94.2	–	+	–	97.8	97.2	–	–	–	+	88	–	82.8	N/A	–	–	+	+	–	–	+	90.4	–	–	+	+	99.9	89.4	–	99.8	–	–	–	–	+	+	+	+	+	+	–	99.9	+	98.9
C. lukuohia (Hawaii) C4370	100	100	–	–	96.5	94.2	–	+	–	97.8	97.2	–	–	–	+	88	–	82.8	N/A	–	–	+	+	–	–	+	90.4	–	–	+	+	99.9	89.4	–	99.8	–	–	–	–	+	+	+	+	+	+	–	99.9	+	98.9
C. lukuohia (Hawaii) C4379	100	100	–	–	96.5	94.2	–	+	–	97.8	97.2	–	–	–	+	88	–	82.8	N/A	–	–	+	+	–	–	+	90.4	–	–	+	+	99.9	89.4	–	99.8	–	–	–	–	+	+	+	+	+	+	–	99.9	+	98.9
C. lukuohia (Hawaii) C4187	–	100	–	–	96.5	94.2	–	+	–	97.8	97.2	–	–	–	+	88	–	82.8	N/A	–	–	+	+	–	–	+	90.4	–	–	+	+	99.9	89.4	–	99.8	–	–	–	–	+	+	+	+	+	+	–	99.9	+	98.9
C. lukuohia (Hawaii) C4123	–	100	–	–	96.5	94.2	–	+	–	97.8	97.2	–	–	–	+	88	–	82.8	N/A	–	–	+	+	–	–	+	90.4	–	–	+	+	99.9	89.4	–	99.8	–	–	–	–	+	+	+	+	+	+	–	99.9	+	98.9
C. lukuohia (Hawaii) C4253	–	100	–	–	96.5	94.2	–	+	–	97.8	97.2	–	–	–	+	88	–	82.8	N/A	–	–	+	+	–	–	+	90.4	–	–	+	+	99.9	89.4	–	99.8	–	–	–	–	+	+	+	+	+	+	–	99.9	+	98.9
C. lukuohia (Hawaii) C4372	–	–	–	–	96.5	94.2	–	+	–	97.8	97.2	–	–	–	+	88	–	82.8	N/A	–	–	+	+	–	–	+	90.4	–	–	+	+	99.9	89.4	–	99.8	–	–	–	–	+	+	+	+	+	+	–	99.9	+	98.9
C. lukuohia (Hawaii) C4212	–	–	–	–	96.5	94.2	–	+	–	97.8	97.2	–	–	–	+	88	–	82.8	N/A	–	–	+	+	–	–	+	90.4	–	–	+	+	99.9	89.4	–	99.8	–	–	–	–	+	+	+	+	+	+	–	99.9	+	98.9
C. fimbriata ex Xanthosoma (Costa Rica) C1780	–	–	–	+	94.9	94.2	–	+	–	97.8	97.2	–	–	–	+	88	–	82.2	N/A	–	74.1	+	+	–	–	+	98.3	97.3	96.8	+	+	97.9	–	+	99.8	–	–	–	–	+	+	+	+	+	+	–	99.9	+	98.9
C. fimbriata ex Syngonium (Hawaii) C4121	–	–	–	+	94.9	94.2	–	+	–	97.8	97.2	–	91.4	–	+	74.3	–	82.8	N/A	–	–	+	+	–	–	+	90.4	–	–	+	+	97.9	89.4	+	99.8	–	–	–	–	+	+	+	+	+	+	80.2	99.9	+	98.9
C. fimbriata ex Syngonium (Florida) C1809	–	–	–	+	94.9	94.2	–	+	–	97.8	97.2	–	91.4	–	+	74.3	–	82.8	N/A	–	–	+	+	–	–	+	90.4	–	–	+	+	97.9	89.4	+	99.8	–	–	–	–	+	+	+	+	+	+	80.2	99.9	+	98.9
C. fimbriata ex Hevea (Guatemala) C1944	–	–	–	+	97.5	–	–	+	–	97.8	97.2	–	–	–	+	74.3	–	82.8	N/A	–	–	+	+	–	–	+	90.4	–	–	+	–	97.9	89.4	–	99.8	–	99	–	–	+	+	+	–	+	+	–	99.9	+	98.9
C. fimbriata ex Coffea (Costa Rica) C1551	–	–	–	+	–	94.2	+	–	–	97.8	–	–	–	–	+	–	–	82.8	N/A	–	–	+	+	–	–	–	90.4	–	–	+	+	99.9	89.4	–	99.8	–	–	–	–	+	+	+	+	+	+	–	99.9	–	99.6
C. platani (Italy) GenBank ASM97888v1	–	–	–	+	96.5	–	–	+	–	97.8	97.2	–	–	–	+	–	–	82.8	N/A	–	–	+	+	–	–	–	90.4	–	–	+	+	99.9	89.4	–	99.8	–	–	–	–	+	+	+	–	+	–	–	99.9	+	98.9
C. fimbriata ex Spathodea (Cuba) C1811	–	–	–	–	94.1	93.3	–	+	–	97.8	97.9	–	–	–	–	74.3	+	82.7	N/A	–	–	+	+	–	–	+	90.4	–	–	+	–	99.9	90.1	+	99.1	–	–	–	–	+	+	+	–	+	+	–	99.9	–	–
C. papillata (Colombia) C1750	–	–	–	+	99.2	–	–	+	–	97.8	95.7	–	–	–	+	87.7	–	82.8	N/A	–	–	+	+	–	–	+	90.4	–	–	+	–	99.9	89.4	–	99.8	–	–	–	–	+	+	+	+	+	+	–	99.9	–	98.9
C. colombiana (Colombia) C1945	–	–	–	+	–	–	–	+	–	97.7	97.2	–	91.3	–	+	87.8	–	82.2	N/A	99.3	–	+	+	–	–	+	90.4	–	–	+	–	99.9	89.4	+	99.1	–	99.3	–	–	+	+	+	–	+	–	–	99.9	–	98.9
C. cacaofunesta (Brazil) GenBank JX185564; =C1593)	–	–	–	–	–	–	–	+	–	97.8	95.5	–	–	–	–	–	–	–	N/A	–	–	+	+	–	–	+	90.4	–	96.8	+	–	99.9	90.1	+	99.1	–	–	–	–	+	+	+	+	+	–	–	99.9	–	–
C. cacaofunesta (Brazil) C1983	–	–	–	–	97.6	–	–	–	–	97.8	95.5	–	–	–	–	87.8	–	82.7	N/A	–	–	+	+	–	–	+	90.4	–	96.8	+	–	99.9	89.3	–	99.1	–	–	–	–	+	+	+	–	+	–	–	99.9	–	99.6
C. fimbriata ex Ipomoea (N. Carolina) C1421	–	–	–	–	94.8	–	–	+	–	97.8	95.7	–	–	–	+	74.2	–	82.1	N/A	98.8	–	+	+	–	–	+	90.4	–	–	+	–	97.9	91.4	+	99.1	–	99.3	–	–	+	+	+	+	+	+	80.1	99.9	+	99.6
C. fimbriata ex Eucalyptus (Brazil) C1442	–	–	–	–	97.5	–	–	+	–	97.8	95.6	–	–	–	–	–	–	82.7	N/A	–	–	+	+	–	–	–	90.4	–	–	+	–	99.9	90.1	–	99.1	–	–	–	–	+	+	+	–	+	–	–	99.9	–	–
C. fimbriata ex Mangifera (Brazil) C1688	–	–	–	–	–	–	–	+	–	97.8	–	–	–	–	–	87.8	–	82.7	N/A	–	–	+	+	–	–	–	90.4	–	–	+	–	99.9	90.1	–	99.1	–	–	–	–	+	+	+	–	+	–	–	99.9	–	99.7
[truncated: 45 more columns]
